# Supplementary material for: Enhanced glycolysis and HIF-1α activation in adipose tissue macrophages sustains local and systemic interleukin-1β production in obesity
Source: PubMed Central journal article supplement (PMC7101445; doi:10.1038/s41598-020-62272-9), 2020-03-27
Supplement: 41598_2020_62272_MOESM1_ESM.pdf [file 41598_2020_62272_MOESM1_ESM.pdf]

## **Supplementary Data File**

**Enhanced glycolysis and HIF-1 $\alpha$  activation in adipose tissue macrophages sustains local and systemic interleukin-1 $\beta$  production in obesity**

Monika Sharma<sup>1</sup>, Ludovic Boytard<sup>2</sup>, Tarik Hadi<sup>2</sup>, Graeme Koelwyn<sup>1</sup>, Russell Simon<sup>1</sup>, Mireille Ouimet<sup>1</sup>, Lena Seifert<sup>2</sup>, Westley Spiro<sup>1</sup>, Bo Yan<sup>1</sup>, Susan Hutchison<sup>1</sup>, Edward A. Fisher<sup>1</sup>, Ravichandran Ramasamy<sup>3</sup>, , Bhama Ramkhelawon<sup>2\*</sup>, Kathryn J Moore<sup>1\*</sup>

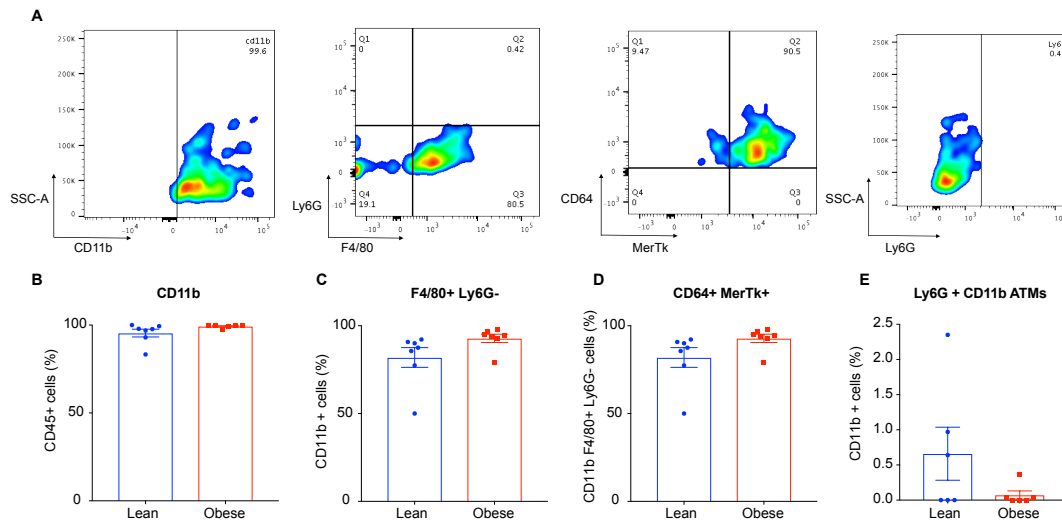

**Supplementary Figure 1: A)** Gating strategy for flow cytometric analysis of CD11b, F4/80, Ly6G, CD64, MerTk populations performed using Flowjo software. Flow cytometric quantification of **B)** CD11b, **C)** F4/80+Ly6G-, **D)** CD64+MerTk+, and **E)** Ly6G in ATMs from lean and obese wild type (WT) mice (n=6-7).

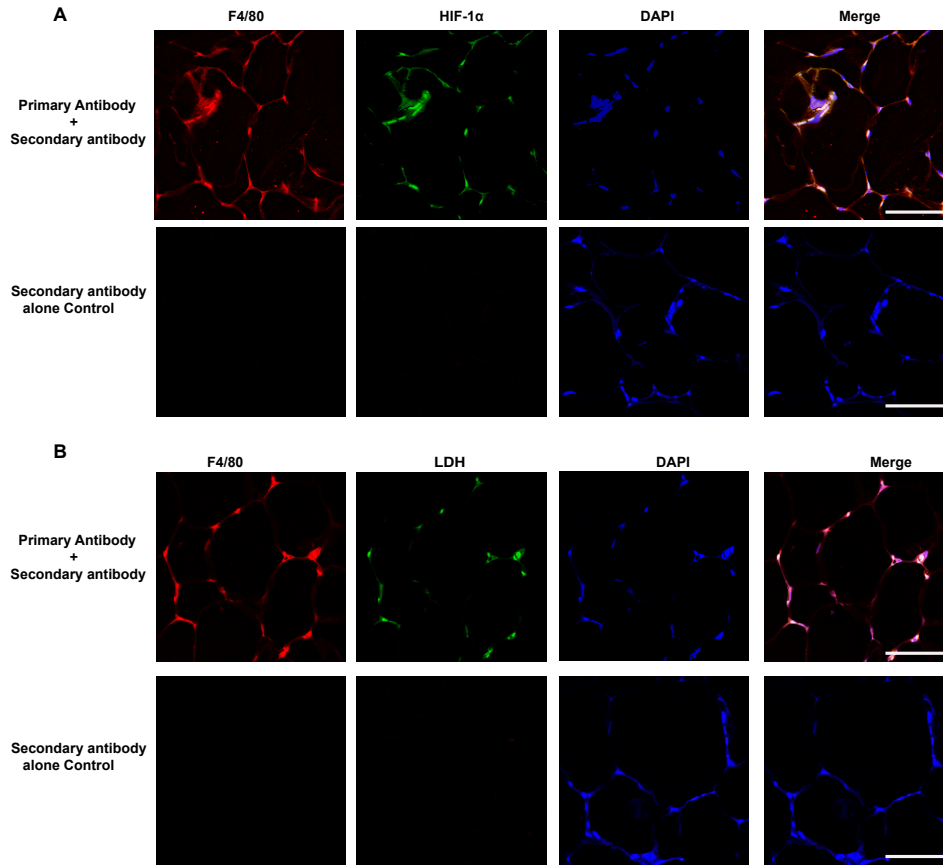

**Supplementary Figure 2:** Representative immunofluorescence staining of the **A)** macrophage marker F4/80 (red), HIF-1 $\alpha$  (green), DAPI (blue), and **B)** macrophage marker F4/80 (red), lactate dehydrogenase (LDH; green), DAPI (blue) in WAT of wild type mice fed HFD for 20 weeks. Colocalization of HIF-1 $\alpha$  with F4/80 and DAPI is shown in the merged image (arrows). Lower panel shows secondary antibody alone controls. Scale bar =100  $\mu$ m.

Supplementary Figure 3

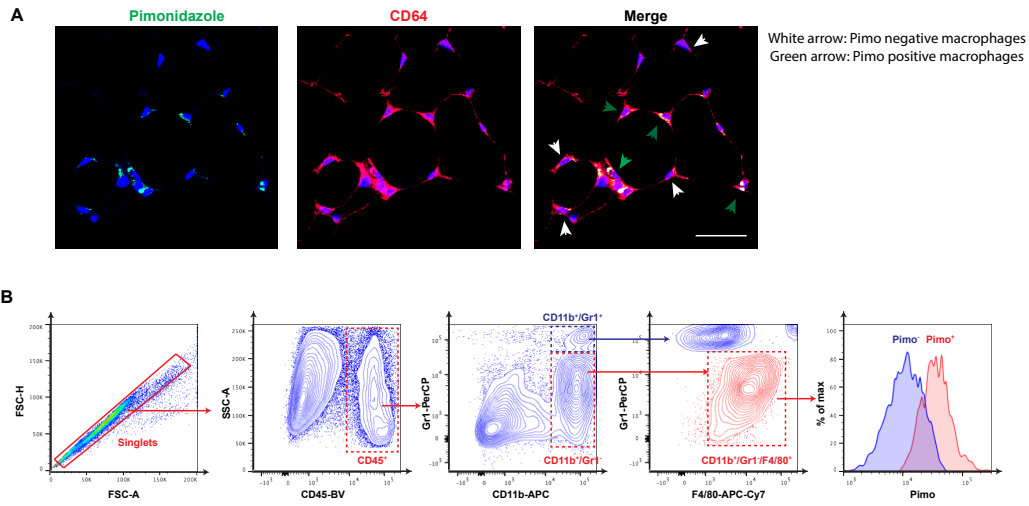

**Supplementary Figure 3: A)** Representative images of immunofluorescence staining for pimonidazole (green), CD64 (red) and DAPI nuclear stain (blue) in WAT of obese wild type mice. Scale bar = 100  $\mu$ m. **B)** Gating strategy for flow cytometer as shown for singlets, CD45, CD11b, F4/80 and pimonidazole populations performed by Flowjo analysis.

Supplementary Figure 4

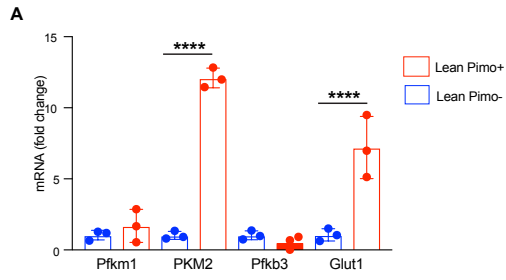

**Supplementary Figure 4:** Relative mRNA expression of *Pfk1*, *Pkm2*, *Pfk3* and *Glut1* in Pimonidazole (Pimo)- and Pimo+ ATMs isolated from lean mice (n=3). Data are mean  $\pm$  s.e.m. \*\*\*\*p < 0.001.

Supplementary Figure 5

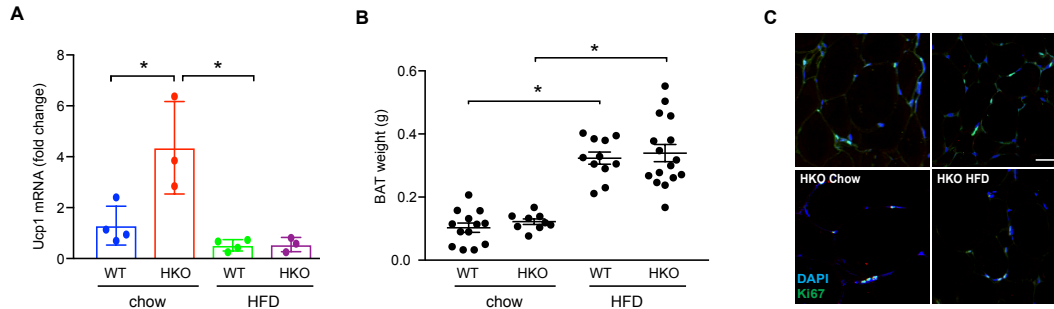

**Supplementary Figure 5: A)** Fold change in *Ucp1* mRNA in WAT of lean and obese WT and HKO mice. **B)** BAT weight of WT and HKO mice after 20 weeks of chow and HFD diet. **C)** Immunofluorescence staining of Ki67 (green) and DAPI nuclear stain (blue) in WAT of lean and obese WT and HKO mice. Scale bar = 100  $\mu$ m.
